# Supplementary material
Source: publisher figshare collection journal article supplement (https://acs.figshare.com/ndownloader/files/27572734)
Supplement: Supplementary file 1 [file 27572734]

1 **Supporting Information**

2 **Bacterial and microfauna mechanisms for sludge reduction in carrier-enhanced**  
3 **anaerobic side-stream reactor revealed by metagenomic sequencing analysis**

4 Jie Jiang<sup>a</sup>, Zhen Zhou<sup>a,c,\*</sup>, Lingyan Jiang<sup>b,c</sup>, Yue Zheng<sup>a</sup>, Xiaodan Zhao<sup>a</sup>, Guang Chen<sup>b</sup>,  
5 Mengyu Wang<sup>a</sup>, Jing Huang<sup>a</sup>, Ying An<sup>a</sup>, Zhichao Wu<sup>c,d</sup>

6 <sup>a</sup> Shanghai Engineering Research Center of Energy - Saving in Heat Exchange Systems,  
7 Shanghai University of Electric Power, Shanghai 200090, China

8 <sup>b</sup> Shanghai Chengtou Wastewater Treatment Co., Ltd, Shanghai 201203, China

9 <sup>c</sup> Shanghai Institute of Pollution Control and Ecological Security, Shanghai, 200092,  
10 China

11 <sup>d</sup> State Key Laboratory of Pollution Control and Resource Reuse, College of  
12 Environmental Science and Engineering, Tongji University, Shanghai, 200092, China

13 \* Corresponding author. E-mail: zhouzhen@shiep.edu.cn.

14  
15 ***Number of Pages: 13***

16 ***Number of Texts: 4***

17 ***Number of Figure : 4***

18 ***Number of Tables:3***

## 1. Supplementary methods

Text S1

### 1.1. Calculation methods for $Y_{\text{obs}}$ and $K_d$

The observed sludge yield ( $Y_{\text{obs}}$ ) was calculated according to Eq. (1) <sup>1</sup>.

$$Y_{\text{obs}} = \frac{\sum \Delta X_i V_i + \sum Q_w X_w \Delta t}{\sum Q_i (S_0 - S_e) \Delta t} \quad (1)$$

where  $\Delta X_i$  is the varied sludge concentration in reactor  $i$ , mg/L;  $\Delta t$  is duration of the operation period, d;  $V_i$  is the volume of reactor  $i$ , L;  $Q_w$  is flow rate of WAS, L/d;  $X_w$  is sludge concentration in WAS, mg/L;  $S_0$  and  $S_e$  is substrate concentration of influent and effluent, respectively, mg COD/L.

At a steady state, sludge decay in an ASSR-MBR or its deviation can be expressed as Eq. (2) according to mass balance model <sup>2</sup>.

$$\Delta X_{d,m} + \Delta X_{d,a} = K_{d,m} V_m X_{s,m} + K_{d,a} V_a X_{s,a} = \Delta X_{g,m} + \Delta X_{g,a} - \Delta X_w \quad (2)$$

where  $\Delta X_{d,m}$  and  $\Delta X_{d,a}$  are sludge decay in the main stream (using subscript 'm') and ASSR (using subscript 'a'), g/d;  $\Delta X_w$  is sludge variation item of the system, including WAS discharge, effluent loss and sludge accumulation in reactors, g/d;  $\Delta X_{g,m}$  and  $\Delta X_{g,a}$  are sludge generated in the main stream and ASSR, g/d;  $K_{d,a}$  and  $K_{d,m}$  are decay coefficients of ASSR and the main stream reactor, d<sup>-1</sup>;  $V_a$  and  $V_m$  are volumes of ASSR and the main stream reactor, L;  $X_{s,a}$  and  $X_{s,m}$  are sludge concentrations in ASSR and the main stream reactor, g/L. Items  $\Delta X_{g,m}$  and  $\Delta X_{g,a}$  can be calculated based on biomass growth in the main stream and ASSR according to methods and parameters recommended in literatures <sup>2, 3</sup>. Then  $K_{d,m}$  and  $K_{d,a}$  can be estimated by substituting

41  $\Delta X_{g,m}$  and  $\Delta X_{g,a}$  in Eq. (2).

42 Text S2:

43 *1.2. Microbial community analysis*

44 The samples were first processed for DNA extraction using E.Z.N.A. ®. Soil DNA  
45 Kit for soil (OMEGA, USA) according to manufacturer's protocols. The quantity and  
46 quality of the extracted DNA were assessed using a Nanodrop ND-1000  
47 spectrophotometer (Labtech International, UK). Low absorption ratios at 260/230 and  
48 260/280 nm were used as an indicator of humic acids, polysaccharides and protein  
49 impurities. The v3-v4 region of the 16S rRNA gene was amplified by PCR using 338F  
50 (5'-ACTCCTACGGGAGGCAGCAG-3') and 806R (5'-  
51 GGACTACHVGGGTWTCTA AT-3'). PCR products of the same sample were mixed  
52 and recovered using 2% agarose Gel. The products were purified using the AxyPrep  
53 DNA Gel Extraction Kit (Axygen Biosciences, Union City, CA, USA). The products  
54 were tested by 2% agarose Gel electrophoresis and quantified using Quantus™  
55 Fluorometer (Promega, USA). NEXTFLEX Rapid dna-seq Kit was used to build the  
56 library. Sequencing was performed using the *Illumina-Miseq* PE300 platform. Then  
57 16S rRNA sequences were clustered into operational taxonomic units with an average  
58 length of 440 bp by setting a 3% distance limit<sup>4</sup>.

59 Text S3:

60 *1.3. Mass of the biofilms on the carriers and the surface of membrane*

61 The biomass of the biofilms was determined on carriers from the stable operating

62 reactor. For each measurement, ten carriers covered by biofilm were taken out of the  
63 reactor by five-point sampling. Then the carriers were dried over night at 105 °C and  
64 weighed, after which the biofilm was removed by washing of wire cleaning brush in 1  
65 M NaOH and deionized water. The clean carriers were again dried and weighed.  
66 Biofilm biomass was calculated as the difference in dry weight before and after cleaning.  
67 The tests of biofilm biomass were performed in duplicate.

68 The petri dishes were dried at 105 °C in advance. The sludge on the surface of  
69 membrane was scraped off and put into the petri dishes, and dried at 105°C for 12 h.  
70 SS on the surface of membrane was calculated as the difference in petri dishes before  
71 and after putting into the sludge.

72 Text S4:

#### 73 1.4 Mass balance model for intrasystem flow of nitrogen

74 Mass balance was constructed to describe mitigation and transformation of nitrogen  
75 in water, sludge and air pathways based on experimental data obtained from the four  
76 pilot-scale systems. Mass balance model of nitrogen was established according to  
77 Huang, et al. <sup>5</sup>

78 **2. Supplementary Results**

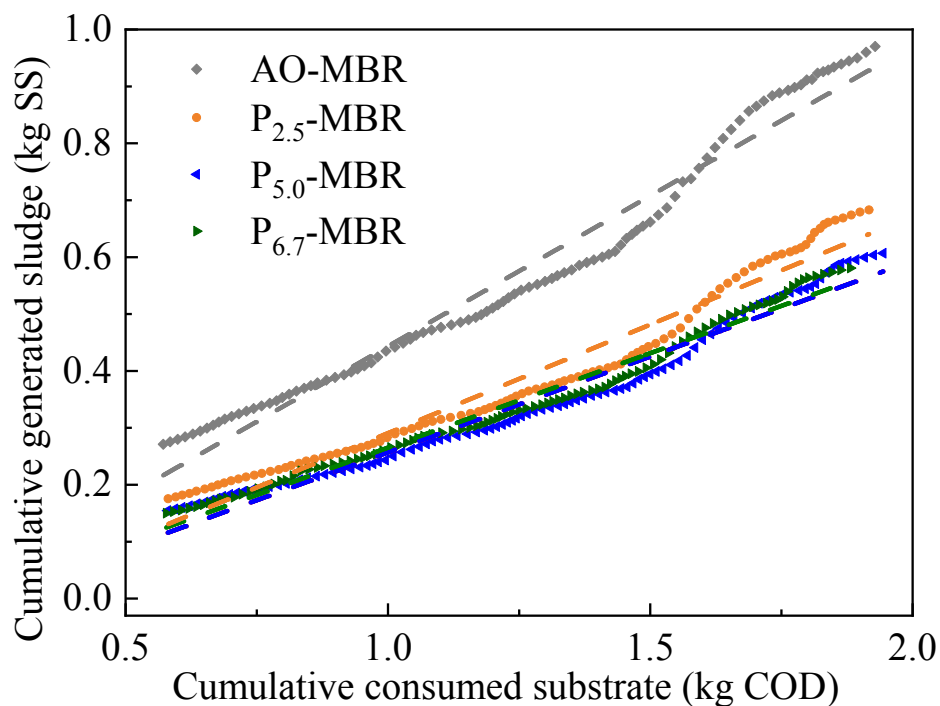

79  
80 **Figure S1** Observed sludge yield in ASSRsAO-MBR and AP-MBRs.

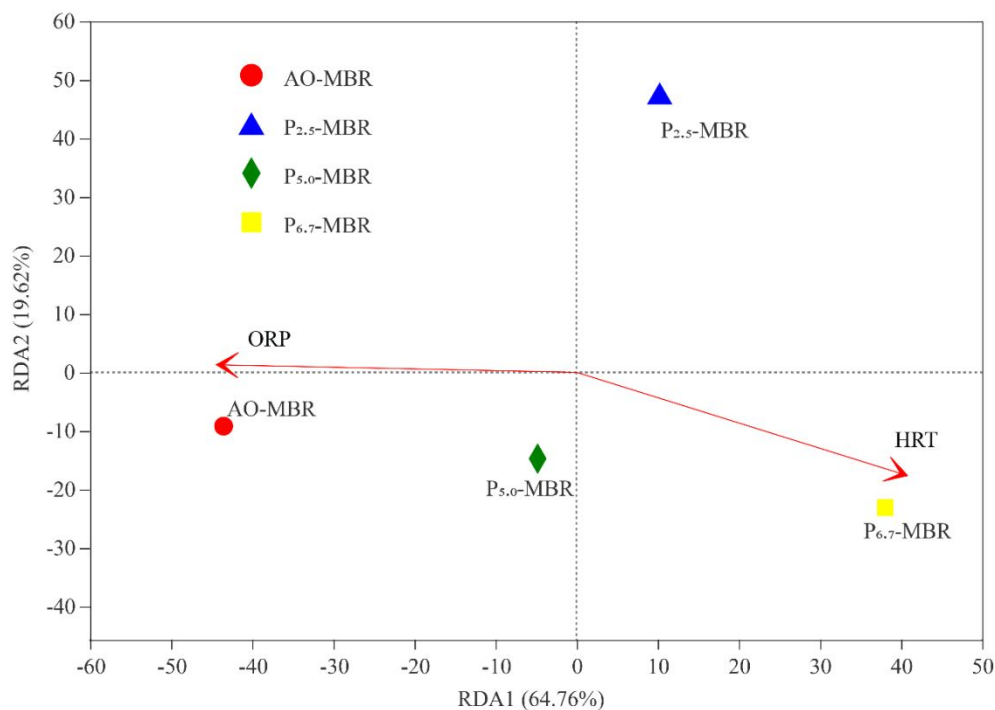

81  
82 **Figure S2** Redundancy analysis (RDA) analysis of *MiSeq* data (symbols) and  
83 environmental characteristics (arrows).

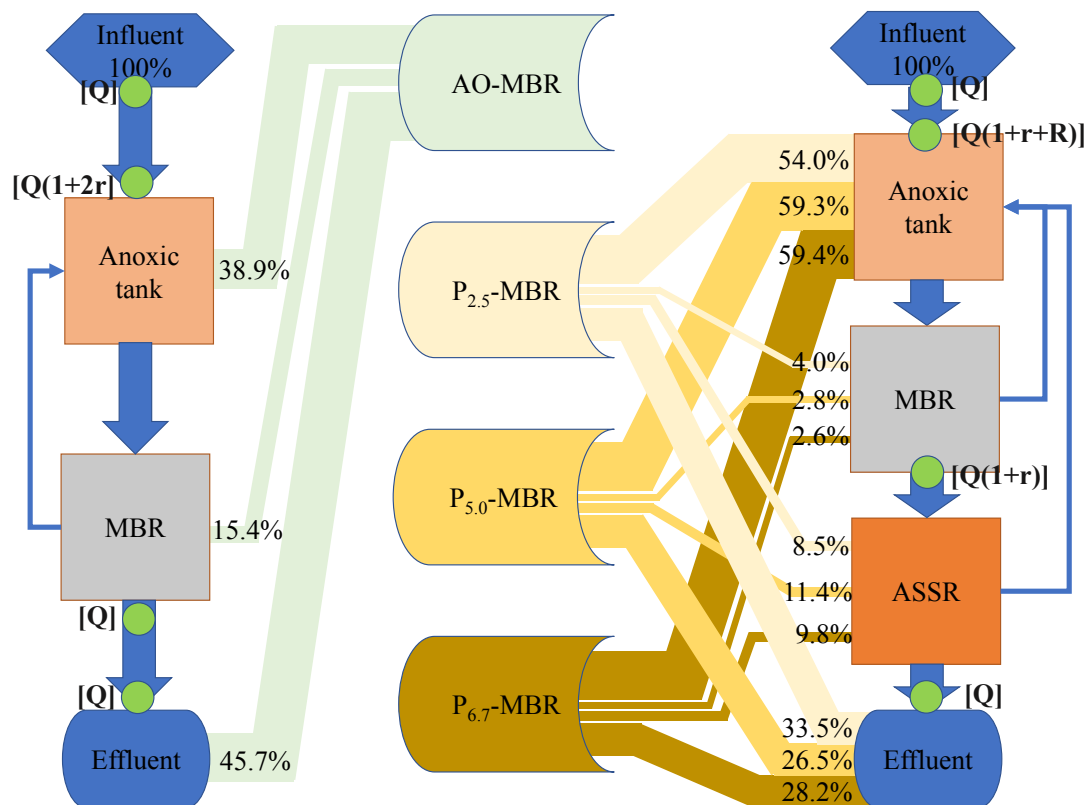

**Figure S3** Mass balance of nitrogen in AO-MBR and AP-MBRs.

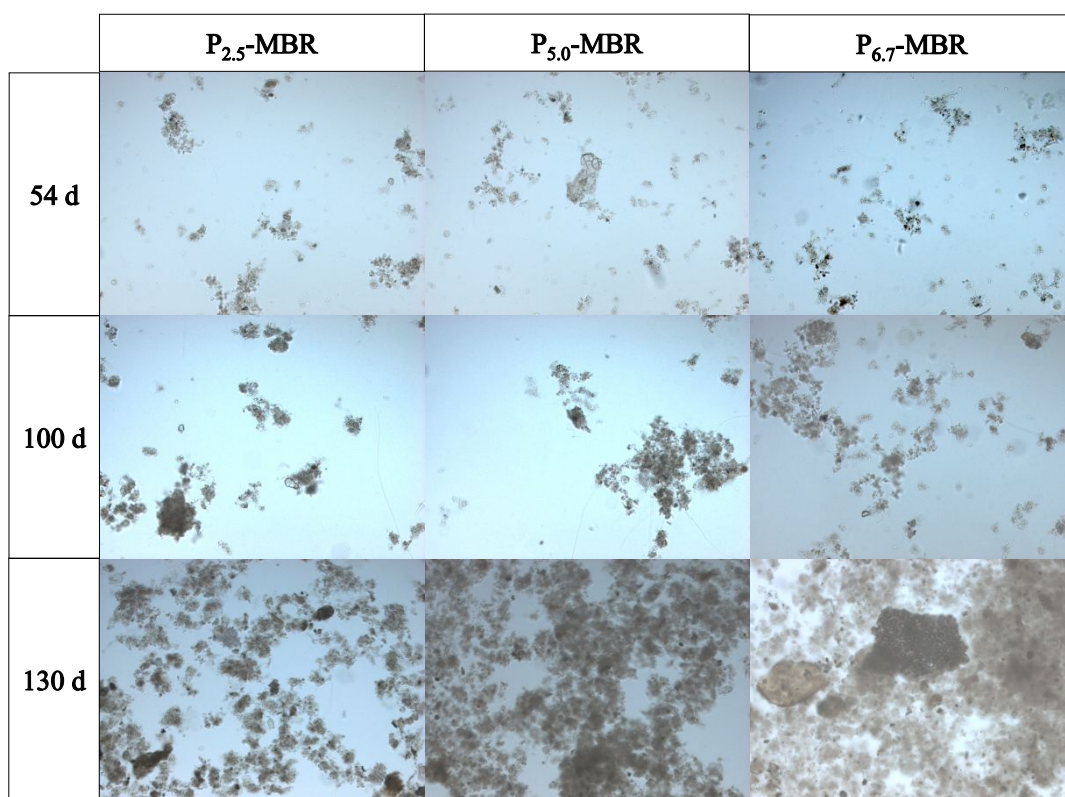

**Figure S4** Microscope images of the biofilm on the carriers.

88 **Table S1** COD consumption in ASSR by  $\Delta\text{COD}_o$ ,  $\Delta\text{COD}_d$  and  $\Delta\text{COD}_c$  with different

89  $\text{HRT}_{\text{SR}}$

| $\text{HRT}_{\text{SR}}$ | $\Delta\text{COD}_o(\text{mg/L})$ | $\Delta\text{COD}_d(\text{mg/L})$ | $\Delta\text{COD}_c(\text{mg/L})$ | Total (mg/L) |
|--------------------------|-----------------------------------|-----------------------------------|-----------------------------------|--------------|
| 2.5                      | 12.36                             | 19.38                             | 7.00                              | 38.74        |
| 5                        | 12.73                             | 21.98                             | 9.60                              | 44.31        |
| 6.7                      | 12.58                             | 22.09                             | 10.52                             | 45.19        |

90

91 **Table S2** Statistics and assembly results of the metagenomic sequencing data

| Samples           | Raw sequence      |                     | Sequence after quality-filtering |                     |                      |                      | Assembly          |      |      |
|-------------------|-------------------|---------------------|----------------------------------|---------------------|----------------------|----------------------|-------------------|------|------|
|                   | Raw reads         | Raw base            | Clean reads                      | Clean base          | Percent of raw reads | Percent of raw bases | Contigs           | N50  | N90  |
|                   | ( $\times 10^7$ ) | ( $\times 10^9$ bp) | ( $\times 10^7$ )                | ( $\times 10^9$ bp) | (%)                  | (%)                  | ( $\times 10^5$ ) | (bp) | (bp) |
| MBR <sub>AO</sub> | 5.48              | 8.27                | 5.41                             | 8.16                | 98.8                 | 98.6                 | 8.60              | 640  | 345  |
| ASSR <sub>L</sub> | 4.23              | 6.39                | 4.20                             | 6.33                | 99.2                 | 99.0                 | 7.09              | 716  | 351  |
| ASSR <sub>M</sub> | 5.10              | 7.70                | 5.07                             | 7.64                | 99.4                 | 99.2                 | 8.61              | 703  | 351  |
| ASSR <sub>H</sub> | 5.29              | 7.99                | 5.26                             | 7.93                | 99.4                 | 99.2                 | 7.96              | 702  | 351  |
| P <sub>L</sub>    | 5.79              | 8.74                | 5.75                             | 8.66                | 99.4                 | 99.1                 | 6.09              | 703  | 350  |
| P <sub>M</sub>    | 6.20              | 9.36                | 6.16                             | 9.29                | 99.4                 | 99.2                 | 7.28              | 689  | 347  |
| P <sub>H</sub>    | 5.81              | 8.78                | 5.78                             | 8.7                 | 99.3                 | 99.1                 | 7.47              | 730  | 353  |

92



93 **Table S3** Population distributions of protozoa and metazoa expressed in abundance categories

| Kingdom  | Class     | Species              | Operation | MBRs              |                  |                  |                  | ASSRs             |                   |                   | Packing Carriers |                |                |
|----------|-----------|----------------------|-----------|-------------------|------------------|------------------|------------------|-------------------|-------------------|-------------------|------------------|----------------|----------------|
|          |           |                      | Time (d)  | MBR <sub>AO</sub> | MBR <sub>L</sub> | MBR <sub>M</sub> | MBR <sub>H</sub> | ASSR <sub>L</sub> | ASSR <sub>M</sub> | ASSR <sub>H</sub> | P <sub>L</sub>   | P <sub>M</sub> | P <sub>H</sub> |
| Protozoa | Sarcodine | <i>Arcella</i>       | 54        |                   |                  |                  | ++               |                   |                   | +++               |                  |                | +++            |
|          |           |                      | 100       | +                 | +                | +++              | ++               | +                 | +++               | ++                |                  |                | +++            |
|          |           |                      | 130       | +                 | +                | +++              | +++              | +                 | +++               | +++               |                  | +++            | +++            |
|          |           | <i>Clathrulina</i>   | 54        |                   |                  |                  |                  |                   |                   |                   |                  |                |                |
|          |           |                      | 100       |                   | ++               | +++              | +++              | +                 | +++               | +++               |                  |                |                |
|          |           |                      | 130       |                   | ++               | ++               | +                | +                 | ++                | +++               |                  |                | ++             |
|          | Ciliate   | <i>Aspidisca</i>     | 54        | +++               | +++              | +++              | +++              | +++               | +++               | +++               | +++              | +++            | +++            |
|          |           |                      | 100       | +++               | +++              | +++              | +++              | +++               | +++               | +++               | +++              | +++            | +++            |
|          |           |                      | 130       | +++               | +++              | +++              | +++              | +++               | +++               | +++               | ++               | +++            | +++            |
|          |           | <i>Litonotus</i>     | 54        |                   |                  | +++              | +++              | ++                | +++               | +++               |                  |                | +++            |
|          |           |                      | 100       |                   |                  | +++              | +++              | +                 | +++               | +++               | +++              | +++            | +++            |
|          |           |                      | 130       |                   |                  | +++              | +++              | ++                | +++               | +++               | +++              | +++            | +++            |
|          |           | <i>Chiloclonella</i> | 54        |                   | +++              | +++              | +++              | ++                | +++               | +++               |                  | +              |                |

---

|                   |     |     |     |     |     |     |     |     |    |     |     |
|-------------------|-----|-----|-----|-----|-----|-----|-----|-----|----|-----|-----|
|                   | 100 | +   | +++ | +++ | +++ | +++ | +++ | +++ | +  | ++  | +++ |
|                   | 130 |     | +++ | +++ | +++ | +++ | +++ | +++ | ++ | +++ | +++ |
|                   | 54  |     |     | +   | +   |     |     |     |    |     |     |
| <i>Tokophrya</i>  | 100 |     |     | +   | +   |     |     |     |    |     |     |
|                   | 130 |     |     | +   | ++  |     |     |     |    |     |     |
|                   | 54  |     |     |     |     |     |     |     |    |     | +   |
| <i>Heliophrya</i> | 100 |     |     |     |     |     |     |     |    |     | +   |
|                   | 130 |     |     |     |     |     |     |     |    | +   | +   |
|                   | 54  |     |     |     |     |     | +   | +   |    |     |     |
| <i>Cothumia</i>   | 100 | +++ |     | +   | +   | +   | +   | +   | +  | +   | +   |
|                   | 130 |     |     |     |     |     |     |     |    |     |     |
|                   | 54  | +   |     |     |     | +   |     |     |    |     |     |
| <i>Paramecium</i> | 100 | +   |     |     |     | ++  |     |     |    |     |     |
|                   | 130 |     |     |     |     |     |     |     |    |     |     |
|                   | 54  |     |     |     |     |     |     | +   |    |     | +++ |
| <i>Scyphidia</i>  | 100 |     |     | +   | +   |     |     |     |    |     |     |
|                   | 130 |     |     |     |     |     |     |     |    |     |     |

---

|         |         |                |    |  |  |  |  |  |  |  |  |  |  |  |  |  |  |  |  |  |  |  |  |  |  |  |  |  |  |  |  |  |  |  |  |  |  |  |  |  |  |  |  |  |  |  |  |  |  |  |  |  |  |  |  |  |  |  |  |  |  |  |  |  |  |  |  |  |  |  |  |  |  |  |  |  |  |  |  |  |  |  |  |  |  |  |  |  |  |  |  |  |  |  |  |  |  |  |  |  |  |  |  |  |  |  |  |  |  |  |  |  |  |  |  |  |  |  |  |  |  |  |  |  |  |  |  |  |  |  |  |  |  |  |  |  |  |  |  |  |  |  |  |  |  |  |  |  |  |  |  |  |  |  |  |  |  |  |  |  |  |  |  |  |  |  |  |  |  |  |  |  |  |  |  |  |  |  |  |  |  |  |  |  |  |  |  |  |  |  |  |  |  |  |  |  |  |  |  |  |  |  |  |  |  |  |  |  |  |  |  |  |  |  |  |  |  |  |  |  |  |  |  |  |  |  |  |  |  |  |  |  |  |  |  |  |  |  |  |  |  |  |  |  |  |  |  |  |  |  |  |  |  |  |  |  |  |  |  |  |  |  |  |  |  |  |  |  |  |  |  |  |  |  |  |  |  |  |  |  |  |  |  |  |  |  |  |  |  |  |  |  |  |  |  |  |  |  |  |  |  |  |  |  |  |  |  |  |  |  |  |  |  |  |  |  |  |  |  |  |  |  |  |  |  |  |  |  |  |  |  |  |  |  |  |  |  |  |  |  |  |  |  |  |  |  |  |  |  |  |  |  |  |  |  |  |  |  |  |  |  |  |  |  |  |  |  |  |  |  |  |  |  |  |  |  |  |  |  |  |  |  |  |  |  |  |  |  |  |  |  |  |  |  |  |  |  |  |  |  |  |  |  |  |  |  |  |  |  |  |  |  |  |  |  |  |  |  |  |  |  |  |  |  |  |  |  |  |  |  |  |  |  |  |  |  |  |  |  |  |  |  |  |  |  |  |  |  |  |  |  |  |  |  |  |  |  |  |  |  |  |  |  |  |  |  |  |  |  |  |  |  |  |  |  |  |  |  |  |  |  |  |  |  |  |  |  |  |  |  |  |  |  |  |  |  |  |  |  |  |  |  |  |  |  |  |  |  |  |  |  |  |  |  |  |  |  |  |  |  |  |  |  |  |  |  |  |  |  |  |  |  |  |  |  |  |  |  |  |  |  |  |  |  |  |  |  |  |  |  |  |  |  |  |  |  |  |  |  |  |  |  |  |  |  |  |  |  |  |  |  |  |  |  |  |  |  |  |  |  |  |  |  |  |  |  |  |  |  |  |  |  |  |  |  |  |  |  |  |  |  |  |  |  |  |  |  |  |  |  |  |  |  |  |  |  |  |  |  |  |  |  |  |  |  |  |  |  |  |  |  |  |  |  |  |  |  |  |  |  |  |  |  |  |  |  |  |  |  |  |  |  |  |  |  |  |  |  |  |  |  |  |  |  |  |  |  |  |  |  |  |  |  |  |  |  |  |  |  |  |  |  |  |  |  |  |  |  |  |  |  |  |  |  |  |  |  |  |  |  |  |  |  |  |  |  |  |  |  |  |  |  |  |  |  |  |  |  |  |  |  |  |  |  |  |  |  |  |  |  |  |  |  |  |  |  |  |  |  |  |  |  |  |  |  |  |  |  |  |  |  |  |  |  |  |  |  |  |  |  |  |  |  |  |  |  |  |  |  |  |  |  |  |  |  |  |  |  |  |  |  |  |  |  |  |  |  |  |  |  |  |  |  |  |  |  |  |  |  |  |  |  |  |  |  |  |  |  |  |  |  |  |  |  |  |  |  |  |  |  |  |  |  |  |  |  |  |  |  |  |  |  |  |  |  |  |  |  |  |  |  |  |  |  |  |  |  |  |  |  |  |  |  |  |  |  |  |  |  |  |  |  |  |  |  |  |  |  |  |  |  |  |  |  |  |  |  |  |  |  |  |  |  |  |  |  |  |  |  |  |  |  |  |  |  |  |  |  |  |  |  |  |  |  |  |  |  |  |  |  |  |  |  |  |  |  |  |  |  |  |  |  |  |  |  |  |  |  |  |  |  |  |  |  |  |  |  |  |  |  |  |  |  |  |  |  |  |  |  |  |  |  |  |  |  |  |  |  |  |  |  |  |  |  |  |  |  |  |  |  |  |  |  |  |  |  |  |  |  |  |  |  |  |  |  |  |  |  |  |  |  |  |  |  |  |  |  |  |  |  |  |  |  |  |  |  |  |  |  |  |  |  |  |  |  |  |  |  |  |  |  |  |  |  |  |  |  |  |  |  |  |  |  |  |  |  |  |  |  |  |  |  |  |  |  |  |  |  |  |  |  |  |  |  |  |  |  |  |  |  |  |  |  |  |  |  |  |  |  |  |  |  |  |  |  |  |  |  |  |  |  |  |  |  |  |  |  |  |  |  |  |  |  |  |  |  |  |  |  |  |  |  |  |  |  |  |  |  |  |  |  |  |  |  |  |  |  |  |  |  |  |  |  |  |  |  |  |  |  |  |  |  |  |  |  |  |  |  |  |  |  |  |  |  |  |  |  |  |  |  |  |  |  |  |  |  |  |  |  |  |  |  |  |  |  |  |  |  |  |  |  |  |  |  |  |  |  |  |  |  |  |  |  |  |  |  |  |  |  |  |  |  |  |  |  |  |  |  |  |  |  |  |  |  |  |  |  |  |  |  |  |  |  |  |  |  |  |  |  |  |  |  |  |  |  |  |  |  |  |  |  |  |  |  |  |  |  |  |  |  |  |  |  |  |  |  |  |  |  |  |  |  |  |  |  |  |  |  |  |  |  |  |  |  |  |  |  |  |  |  |  |  |  |  |  |  |  |  |  |  |  |  |  |  |  |  |  |  |  |  |  |  |  |  |  |  |  |  |  |  |  |  |  |  |  |  |  |  |  |  |  |  |  |  |  |  |  |  |  |  |  |  |  |  |  |  |  |  |  |  |  |  |  |  |  |  |  |  |  |  |  |  |  |  |  |  |  |  |  |  |  |  |  |  |  |  |  |  |  |  |  |  |  |  |  |  |  |  |  |  |  |  |  |  |  |  |  |  |  |  |  |  |  |  |  |  |  |  |  |  |  |  |  |  |  |  |  |  |  |  |  |  |  |  |  |  |  |  |  |  |  |  |  |  |  |  |  |  |  |  |  |  |  |  |  |  |  |  |  |  |  |  |  |  |  |  |  |  |  |  |  |  |  |  |  |  |  |  |  |  |  |  |  |  |  |  |  |  |  |  |  |  |  |  |  |  |  |  |  |  |  |  |  |  |  |  |  |  |  |  |  |  |  |  |  |  |  |  |  |  |  |  |  |  |  |  |  |  |  |  |  |  |  |  |  |  |  |  |  |  |  |  |  |  |  |  |  |  |  |  |  |  |  |  |  |  |  |  |  |  |  |  |  |  |  |  |  |  |  |  |  |  |  |  |  |  |  |  |  |  |    |
|---------|---------|----------------|----|--|--|--|--|--|--|--|--|--|--|--|--|--|--|--|--|--|--|--|--|--|--|--|--|--|--|--|--|--|--|--|--|--|--|--|--|--|--|--|--|--|--|--|--|--|--|--|--|--|--|--|--|--|--|--|--|--|--|--|--|--|--|--|--|--|--|--|--|--|--|--|--|--|--|--|--|--|--|--|--|--|--|--|--|--|--|--|--|--|--|--|--|--|--|--|--|--|--|--|--|--|--|--|--|--|--|--|--|--|--|--|--|--|--|--|--|--|--|--|--|--|--|--|--|--|--|--|--|--|--|--|--|--|--|--|--|--|--|--|--|--|--|--|--|--|--|--|--|--|--|--|--|--|--|--|--|--|--|--|--|--|--|--|--|--|--|--|--|--|--|--|--|--|--|--|--|--|--|--|--|--|--|--|--|--|--|--|--|--|--|--|--|--|--|--|--|--|--|--|--|--|--|--|--|--|--|--|--|--|--|--|--|--|--|--|--|--|--|--|--|--|--|--|--|--|--|--|--|--|--|--|--|--|--|--|--|--|--|--|--|--|--|--|--|--|--|--|--|--|--|--|--|--|--|--|--|--|--|--|--|--|--|--|--|--|--|--|--|--|--|--|--|--|--|--|--|--|--|--|--|--|--|--|--|--|--|--|--|--|--|--|--|--|--|--|--|--|--|--|--|--|--|--|--|--|--|--|--|--|--|--|--|--|--|--|--|--|--|--|--|--|--|--|--|--|--|--|--|--|--|--|--|--|--|--|--|--|--|--|--|--|--|--|--|--|--|--|--|--|--|--|--|--|--|--|--|--|--|--|--|--|--|--|--|--|--|--|--|--|--|--|--|--|--|--|--|--|--|--|--|--|--|--|--|--|--|--|--|--|--|--|--|--|--|--|--|--|--|--|--|--|--|--|--|--|--|--|--|--|--|--|--|--|--|--|--|--|--|--|--|--|--|--|--|--|--|--|--|--|--|--|--|--|--|--|--|--|--|--|--|--|--|--|--|--|--|--|--|--|--|--|--|--|--|--|--|--|--|--|--|--|--|--|--|--|--|--|--|--|--|--|--|--|--|--|--|--|--|--|--|--|--|--|--|--|--|--|--|--|--|--|--|--|--|--|--|--|--|--|--|--|--|--|--|--|--|--|--|--|--|--|--|--|--|--|--|--|--|--|--|--|--|--|--|--|--|--|--|--|--|--|--|--|--|--|--|--|--|--|--|--|--|--|--|--|--|--|--|--|--|--|--|--|--|--|--|--|--|--|--|--|--|--|--|--|--|--|--|--|--|--|--|--|--|--|--|--|--|--|--|--|--|--|--|--|--|--|--|--|--|--|--|--|--|--|--|--|--|--|--|--|--|--|--|--|--|--|--|--|--|--|--|--|--|--|--|--|--|--|--|--|--|--|--|--|--|--|--|--|--|--|--|--|--|--|--|--|--|--|--|--|--|--|--|--|--|--|--|--|--|--|--|--|--|--|--|--|--|--|--|--|--|--|--|--|--|--|--|--|--|--|--|--|--|--|--|--|--|--|--|--|--|--|--|--|--|--|--|--|--|--|--|--|--|--|--|--|--|--|--|--|--|--|--|--|--|--|--|--|--|--|--|--|--|--|--|--|--|--|--|--|--|--|--|--|--|--|--|--|--|--|--|--|--|--|--|--|--|--|--|--|--|--|--|--|--|--|--|--|--|--|--|--|--|--|--|--|--|--|--|--|--|--|--|--|--|--|--|--|--|--|--|--|--|--|--|--|--|--|--|--|--|--|--|--|--|--|--|--|--|--|--|--|--|--|--|--|--|--|--|--|--|--|--|--|--|--|--|--|--|--|--|--|--|--|--|--|--|--|--|--|--|--|--|--|--|--|--|--|--|--|--|--|--|--|--|--|--|--|--|--|--|--|--|--|--|--|--|--|--|--|--|--|--|--|--|--|--|--|--|--|--|--|--|--|--|--|--|--|--|--|--|--|--|--|--|--|--|--|--|--|--|--|--|--|--|--|--|--|--|--|--|--|--|--|--|--|--|--|--|--|--|--|--|--|--|--|--|--|--|--|--|--|--|--|--|--|--|--|--|--|--|--|--|--|--|--|--|--|--|--|--|--|--|--|--|--|--|--|--|--|--|--|--|--|--|--|--|--|--|--|--|--|--|--|--|--|--|--|--|--|--|--|--|--|--|--|--|--|--|--|--|--|--|--|--|--|--|--|--|--|--|--|--|--|--|--|--|--|--|--|--|--|--|--|--|--|--|--|--|--|--|--|--|--|--|--|--|--|--|--|--|--|--|--|--|--|--|--|--|--|--|--|--|--|--|--|--|--|--|--|--|--|--|--|--|--|--|--|--|--|--|--|--|--|--|--|--|--|--|--|--|--|--|--|--|--|--|--|--|--|--|--|--|--|--|--|--|--|--|--|--|--|--|--|--|--|--|--|--|--|--|--|--|--|--|--|--|--|--|--|--|--|--|--|--|--|--|--|--|--|--|--|--|--|--|--|--|--|--|--|--|--|--|--|--|--|--|--|--|--|--|--|--|--|--|--|--|--|--|--|--|--|--|--|--|--|--|--|--|--|--|--|--|--|--|--|--|--|--|--|--|--|--|--|--|--|--|--|--|--|--|--|--|--|--|--|--|--|--|--|--|--|--|--|--|--|--|--|--|--|--|--|--|--|--|--|--|--|--|--|--|--|--|--|--|--|--|--|--|--|--|--|--|--|--|--|--|--|--|--|--|--|--|--|--|--|--|--|--|--|--|--|--|--|--|--|--|--|--|--|--|--|--|--|--|--|--|--|--|--|--|--|--|--|--|--|--|--|--|--|--|--|--|--|--|--|--|--|--|--|--|--|--|--|--|--|--|--|--|--|--|--|--|--|--|--|--|--|--|--|--|--|--|--|--|--|--|--|--|--|--|--|--|--|--|--|--|--|--|--|--|--|--|--|--|--|--|--|--|--|--|--|--|--|--|--|--|--|--|--|--|--|--|--|--|--|--|--|--|--|--|--|--|--|--|--|--|--|--|--|--|--|--|--|--|--|--|--|--|--|--|--|--|--|--|--|--|--|--|--|--|--|--|--|--|--|--|--|--|--|--|--|--|--|--|--|--|--|--|--|--|--|--|--|--|--|--|--|--|--|--|--|--|--|--|--|--|--|--|--|--|--|--|--|--|--|--|--|--|--|--|--|--|--|--|--|--|--|--|--|--|--|--|--|--|--|--|--|--|--|--|--|--|--|--|--|--|--|--|--|--|--|--|--|--|--|--|--|--|--|--|--|--|--|--|--|--|--|--|--|--|--|--|--|--|--|--|--|--|--|--|--|--|--|--|--|--|--|--|--|--|--|--|--|--|--|--|--|--|--|--|--|--|--|--|--|--|--|--|--|--|--|--|--|--|--|--|--|--|--|--|--|--|--|--|--|--|--|--|--|--|--|--|--|--|--|--|--|--|--|--|--|--|--|--|--|--|--|--|--|--|--|--|--|--|--|----|
| Metazoa | Rotifer | <i>Stentor</i> | 54 |  |  |  |  |  |  |  |  |  |  |  |  |  |  |  |  |  |  |  |  |  |  |  |  |  |  |  |  |  |  |  |  |  |  |  |  |  |  |  |  |  |  |  |  |  |  |  |  |  |  |  |  |  |  |  |  |  |  |  |  |  |  |  |  |  |  |  |  |  |  |  |  |  |  |  |  |  |  |  |  |  |  |  |  |  |  |  |  |  |  |  |  |  |  |  |  |  |  |  |  |  |  |  |  |  |  |  |  |  |  |  |  |  |  |  |  |  |  |  |  |  |  |  |  |  |  |  |  |  |  |  |  |  |  |  |  |  |  |  |  |  |  |  |  |  |  |  |  |  |  |  |  |  |  |  |  |  |  |  |  |  |  |  |  |  |  |  |  |  |  |  |  |  |  |  |  |  |  |  |  |  |  |  |  |  |  |  |  |  |  |  |  |  |  |  |  |  |  |  |  |  |  |  |  |  |  |  |  |  |  |  |  |  |  |  |  |  |  |  |  |  |  |  |  |  |  |  |  |  |  |  |  |  |  |  |  |  |  |  |  |  |  |  |  |  |  |  |  |  |  |  |  |  |  |  |  |  |  |  |  |  |  |  |  |  |  |  |  |  |  |  |  |  |  |  |  |  |  |  |  |  |  |  |  |  |  |  |  |  |  |  |  |  |  |  |  |  |  |  |  |  |  |  |  |  |  |  |  |  |  |  |  |  |  |  |  |  |  |  |  |  |  |  |  |  |  |  |  |  |  |  |  |  |  |  |  |  |  |  |  |  |  |  |  |  |  |  |  |  |  |  |  |  |  |  |  |  |  |  |  |  |  |  |  |  |  |  |  |  |  |  |  |  |  |  |  |  |  |  |  |  |  |  |  |  |  |  |  |  |  |  |  |  |  |  |  |  |  |  |  |  |  |  |  |  |  |  |  |  |  |  |  |  |  |  |  |  |  |  |  |  |  |  |  |  |  |  |  |  |  |  |  |  |  |  |  |  |  |  |  |  |  |  |  |  |  |  |  |  |  |  |  |  |  |  |  |  |  |  |  |  |  |  |  |  |  |  |  |  |  |  |  |  |  |  |  |  |  |  |  |  |  |  |  |  |  |  |  |  |  |  |  |  |  |  |  |  |  |  |  |  |  |  |  |  |  |  |  |  |  |  |  |  |  |  |  |  |  |  |  |  |  |  |  |  |  |  |  |  |  |  |  |  |  |  |  |  |  |  |  |  |  |  |  |  |  |  |  |  |  |  |  |  |  |  |  |  |  |  |  |  |  |  |  |  |  |  |  |  |  |  |  |  |  |  |  |  |  |  |  |  |  |  |  |  |  |  |  |  |  |  |  |  |  |  |  |  |  |  |  |  |  |  |  |  |  |  |  |  |  |  |  |  |  |  |  |  |  |  |  |  |  |  |  |  |  |  |  |  |  |  |  |  |  |  |  |  |  |  |  |  |  |  |  |  |  |  |  |  |  |  |  |  |  |  |  |  |  |  |  |  |  |  |  |  |  |  |  |  |  |  |  |  |  |  |  |  |  |  |  |  |  |  |  |  |  |  |  |  |  |  |  |  |  |  |  |  |  |  |  |  |  |  |  |  |  |  |  |  |  |  |  |  |  |  |  |  |  |  |  |  |  |  |  |  |  |  |  |  |  |  |  |  |  |  |  |  |  |  |  |  |  |  |  |  |  |  |  |  |  |  |  |  |  |  |  |  |  |  |  |  |  |  |  |  |  |  |  |  |  |  |  |  |  |  |  |  |  |  |  |  |  |  |  |  |  |  |  |  |  |  |  |  |  |  |  |  |  |  |  |  |  |  |  |  |  |  |  |  |  |  |  |  |  |  |  |  |  |  |  |  |  |  |  |  |  |  |  |  |  |  |  |  |  |  |  |  |  |  |  |  |  |  |  |  |  |  |  |  |  |  |  |  |  |  |  |  |  |  |  |  |  |  |  |  |  |  |  |  |  |  |  |  |  |  |  |  |  |  |  |  |  |  |  |  |  |  |  |  |  |  |  |  |  |  |  |  |  |  |  |  |  |  |  |  |  |  |  |  |  |  |  |  |  |  |  |  |  |  |  |  |  |  |  |  |  |  |  |  |  |  |  |  |  |  |  |  |  |  |  |  |  |  |  |  |  |  |  |  |  |  |  |  |  |  |  |  |  |  |  |  |  |  |  |  |  |  |  |  |  |  |  |  |  |  |  |  |  |  |  |  |  |  |  |  |  |  |  |  |  |  |  |  |  |  |  |  |  |  |  |  |  |  |  |  |  |  |  |  |  |  |  |  |  |  |  |  |  |  |  |  |  |  |  |  |  |  |  |  |  |  |  |  |  |  |  |  |  |  |  |  |  |  |  |  |  |  |  |  |  |  |  |  |  |  |  |  |  |  |  |  |  |  |  |  |  |  |  |  |  |  |  |  |  |  |  |  |  |  |  |  |  |  |  |  |  |  |  |  |  |  |  |  |  |  |  |  |  |  |  |  |  |  |  |  |  |  |  |  |  |  |  |  |  |  |  |  |  |  |  |  |  |  |  |  |  |  |  |  |  |  |  |  |  |  |  |  |  |  |  |  |  |  |  |  |  |  |  |  |  |  |  |  |  |  |  |  |  |  |  |  |  |  |  |  |  |  |  |  |  |  |  |  |  |  |  |  |  |  |  |  |  |  |  |  |  |  |  |  |  |  |  |  |  |  |  |  |  |  |  |  |  |  |  |  |  |  |  |  |  |  |  |  |  |  |  |  |  |  |  |  |  |  |  |  |  |  |  |  |  |  |  |  |  |  |  |  |  |  |  |  |  |  |  |  |  |  |  |  |  |  |  |  |  |  |  |  |  |  |  |  |  |  |  |  |  |  |  |  |  |  |  |  |  |  |  |  |  |  |  |  |  |  |  |  |  |  |  |  |  |  |  |  |  |  |  |  |  |  |  |  |  |  |  |  |  |  |  |  |  |  |  |  |  |  |  |  |  |  |  |  |  |  |  |  |  |  |  |  |  |  |  |  |  |  |  |  |  |  |  |  |  |  |  |  |  |  |  |  |  |  |  |  |  |  |  |  |  |  |  |  |  |  |  |  |  |  |  |  |  |  |  |  |  |  |  |  |  |  |  |  |  |  |  |  |  |  |  |  |  |  |  |  |  |  |  |  |  |  |  |  |  |  |  |  |  |  |  |  |  |  |  |  |  |  |  |  |  |  |  |  |  |  |  |  |  |  |  |  |  |  |  |  |  |  |  |  |  |  |  |  |  |  |  |  |  |  |  |  |  |  |  |  |  |  |  |  |  |  |  |  |  |  |  |  |  |  |  |  |  |  |  |  |  |  |  |  |  |  |  |  |  |  |  |  |  |  |  |  |  |  |  |  |  |  |  |  |  |  |  |  |  |  |  |  |  |  |  |  |  |  |  |  |  |  |  |  |  |  |  |  |  |  |  |  |  |  |  |  |  |  |  |  |  |  |  |  |  |  |  |  |  |  |  |  |  |  | </ |
|---------|---------|----------------|----|--|--|--|--|--|--|--|--|--|--|--|--|--|--|--|--|--|--|--|--|--|--|--|--|--|--|--|--|--|--|--|--|--|--|--|--|--|--|--|--|--|--|--|--|--|--|--|--|--|--|--|--|--|--|--|--|--|--|--|--|--|--|--|--|--|--|--|--|--|--|--|--|--|--|--|--|--|--|--|--|--|--|--|--|--|--|--|--|--|--|--|--|--|--|--|--|--|--|--|--|--|--|--|--|--|--|--|--|--|--|--|--|--|--|--|--|--|--|--|--|--|--|--|--|--|--|--|--|--|--|--|--|--|--|--|--|--|--|--|--|--|--|--|--|--|--|--|--|--|--|--|--|--|--|--|--|--|--|--|--|--|--|--|--|--|--|--|--|--|--|--|--|--|--|--|--|--|--|--|--|--|--|--|--|--|--|--|--|--|--|--|--|--|--|--|--|--|--|--|--|--|--|--|--|--|--|--|--|--|--|--|--|--|--|--|--|--|--|--|--|--|--|--|--|--|--|--|--|--|--|--|--|--|--|--|--|--|--|--|--|--|--|--|--|--|--|--|--|--|--|--|--|--|--|--|--|--|--|--|--|--|--|--|--|--|--|--|--|--|--|--|--|--|--|--|--|--|--|--|--|--|--|--|--|--|--|--|--|--|--|--|--|--|--|--|--|--|--|--|--|--|--|--|--|--|--|--|--|--|--|--|--|--|--|--|--|--|--|--|--|--|--|--|--|--|--|--|--|--|--|--|--|--|--|--|--|--|--|--|--|--|--|--|--|--|--|--|--|--|--|--|--|--|--|--|--|--|--|--|--|--|--|--|--|--|--|--|--|--|--|--|--|--|--|--|--|--|--|--|--|--|--|--|--|--|--|--|--|--|--|--|--|--|--|--|--|--|--|--|--|--|--|--|--|--|--|--|--|--|--|--|--|--|--|--|--|--|--|--|--|--|--|--|--|--|--|--|--|--|--|--|--|--|--|--|--|--|--|--|--|--|--|--|--|--|--|--|--|--|--|--|--|--|--|--|--|--|--|--|--|--|--|--|--|--|--|--|--|--|--|--|--|--|--|--|--|--|--|--|--|--|--|--|--|--|--|--|--|--|--|--|--|--|--|--|--|--|--|--|--|--|--|--|--|--|--|--|--|--|--|--|--|--|--|--|--|--|--|--|--|--|--|--|--|--|--|--|--|--|--|--|--|--|--|--|--|--|--|--|--|--|--|--|--|--|--|--|--|--|--|--|--|--|--|--|--|--|--|--|--|--|--|--|--|--|--|--|--|--|--|--|--|--|--|--|--|--|--|--|--|--|--|--|--|--|--|--|--|--|--|--|--|--|--|--|--|--|--|--|--|--|--|--|--|--|--|--|--|--|--|--|--|--|--|--|--|--|--|--|--|--|--|--|--|--|--|--|--|--|--|--|--|--|--|--|--|--|--|--|--|--|--|--|--|--|--|--|--|--|--|--|--|--|--|--|--|--|--|--|--|--|--|--|--|--|--|--|--|--|--|--|--|--|--|--|--|--|--|--|--|--|--|--|--|--|--|--|--|--|--|--|--|--|--|--|--|--|--|--|--|--|--|--|--|--|--|--|--|--|--|--|--|--|--|--|--|--|--|--|--|--|--|--|--|--|--|--|--|--|--|--|--|--|--|--|--|--|--|--|--|--|--|--|--|--|--|--|--|--|--|--|--|--|--|--|--|--|--|--|--|--|--|--|--|--|--|--|--|--|--|--|--|--|--|--|--|--|--|--|--|--|--|--|--|--|--|--|--|--|--|--|--|--|--|--|--|--|--|--|--|--|--|--|--|--|--|--|--|--|--|--|--|--|--|--|--|--|--|--|--|--|--|--|--|--|--|--|--|--|--|--|--|--|--|--|--|--|--|--|--|--|--|--|--|--|--|--|--|--|--|--|--|--|--|--|--|--|--|--|--|--|--|--|--|--|--|--|--|--|--|--|--|--|--|--|--|--|--|--|--|--|--|--|--|--|--|--|--|--|--|--|--|--|--|--|--|--|--|--|--|--|--|--|--|--|--|--|--|--|--|--|--|--|--|--|--|--|--|--|--|--|--|--|--|--|--|--|--|--|--|--|--|--|--|--|--|--|--|--|--|--|--|--|--|--|--|--|--|--|--|--|--|--|--|--|--|--|--|--|--|--|--|--|--|--|--|--|--|--|--|--|--|--|--|--|--|--|--|--|--|--|--|--|--|--|--|--|--|--|--|--|--|--|--|--|--|--|--|--|--|--|--|--|--|--|--|--|--|--|--|--|--|--|--|--|--|--|--|--|--|--|--|--|--|--|--|--|--|--|--|--|--|--|--|--|--|--|--|--|--|--|--|--|--|--|--|--|--|--|--|--|--|--|--|--|--|--|--|--|--|--|--|--|--|--|--|--|--|--|--|--|--|--|--|--|--|--|--|--|--|--|--|--|--|--|--|--|--|--|--|--|--|--|--|--|--|--|--|--|--|--|--|--|--|--|--|--|--|--|--|--|--|--|--|--|--|--|--|--|--|--|--|--|--|--|--|--|--|--|--|--|--|--|--|--|--|--|--|--|--|--|--|--|--|--|--|--|--|--|--|--|--|--|--|--|--|--|--|--|--|--|--|--|--|--|--|--|--|--|--|--|--|--|--|--|--|--|--|--|--|--|--|--|--|--|--|--|--|--|--|--|--|--|--|--|--|--|--|--|--|--|--|--|--|--|--|--|--|--|--|--|--|--|--|--|--|--|--|--|--|--|--|--|--|--|--|--|--|--|--|--|--|--|--|--|--|--|--|--|--|--|--|--|--|--|--|--|--|--|--|--|--|--|--|--|--|--|--|--|--|--|--|--|--|--|--|--|--|--|--|--|--|--|--|--|--|--|--|--|--|--|--|--|--|--|--|--|--|--|--|--|--|--|--|--|--|--|--|--|--|--|--|--|--|--|--|--|--|--|--|--|--|--|--|--|--|--|--|--|--|--|--|--|--|--|--|--|--|--|--|--|--|--|--|--|--|--|--|--|--|--|--|--|--|--|--|--|--|--|--|--|--|--|--|--|--|--|--|--|--|--|--|--|--|--|--|--|--|--|--|--|--|--|--|--|--|--|--|--|--|--|--|--|--|--|--|--|--|--|--|--|--|--|--|--|--|--|--|--|--|--|--|--|--|--|--|--|--|--|--|--|--|--|--|--|--|--|--|--|--|--|--|--|--|--|--|--|--|--|--|--|--|--|--|--|--|--|--|--|--|--|--|--|--|--|--|--|--|--|--|--|--|--|--|--|--|--|--|--|--|--|--|--|--|--|--|--|--|--|--|--|--|--|--|--|--|--|--|--|--|--|--|--|--|--|--|--|--|--|--|--|--|--|--|--|--|--|--|--|--|--|--|--|--|--|--|--|--|--|--|--|--|--|--|--|--|--|--|--|--|--|--|--|--|--|--|--|--|--|--|--|--|--|--|--|--|--|--|--|--|--|--|--|--|--|--|--|----|

|  |            |                 |     |   |   |   |   |   |    |    |     |     |      |
|--|------------|-----------------|-----|---|---|---|---|---|----|----|-----|-----|------|
|  |            |                 | 130 |   |   |   |   |   | ++ | ++ |     |     |      |
|  |            |                 | 54  |   |   |   |   |   |    |    |     | +   |      |
|  | Crustacean | <i>Cylops</i>   | 100 | + |   |   |   |   |    |    |     | +   | +++  |
|  |            |                 | 130 |   |   |   |   |   |    |    |     | ++  | ++++ |
|  |            |                 | 54  |   |   |   |   |   |    |    |     |     |      |
|  | Nematoda   | <i>Nematoda</i> | 100 |   |   |   |   |   |    |    |     |     |      |
|  |            |                 | 130 | + | + | + | + | + | +  | +  | +++ | +++ | +++  |

94 Note: 1. Absence: (blank); scarce: 1-50 ind./mL (+); moderate: 51–100 ind./mL (++); abundant: 101–500 ind./mL (+++); more abundant: >500 ind./mL (++++).

95 2. The species and abundance of microfauna in the inoculated sludge were sarcodine (+) and rotifers (+) with small size.

96     **References**

- 97     (1). Cheng, C.; Zhou, Z.; Niu, T.; An, Y.; Shen, X.; Pan, W.; Chen, Z.; Liu, J., Effects  
98     of side-stream ratio on sludge reduction and microbial structures of anaerobic side-  
99     stream reactor coupled membrane bioreactors. *Bioresour. Technol.* **2017**, *234*, 380-388.
- 100    (2). Jiang, L. M.; Zhou, Z.; Niu, T.; Jiang, L.; Chen, G.; Pang, H.; Zhao, X.; Qiu, Z.,  
101    Effects of hydraulic retention time on process performance of anaerobic side-stream  
102    reactor coupled membrane bioreactors: Kinetic model, sludge reduction mechanism  
103    and microbial community structures. *Bioresour. Technol.* **2018**, *267*, 218-226.
- 104    (3). Chen, G.-H.; An, K.-J.; Saby, S.; Brois, E.; Djafer, M., Possible cause of excess  
105    sludge reduction in an oxic-settling-anaerobic activated sludge process (OSA process).  
106    *Water Res.* **2003**, *37*, (16), 3855-3866.
- 107    (4). Zheng, Y.; Cheng, C.; Zhou, Z.; Pang, H.; Chen, L.; Jiang, L.-M., Insight into the  
108    roles of packing carriers and ultrasonication in anaerobic side-stream reactor coupled  
109    membrane bioreactors: Sludge reduction performance and mechanism. *Water Res.* **2019**,  
110    *155*, 310-319.
- 111    (5). Huang, J.; Zhou, Z.; Zheng, Y.; Sun, X.; Yu, S.; Zhao, X.; Yang, A.; Wu, C.; Wang,  
112    Z., Biological nutrient removal in the anaerobic side-stream reactor coupled membrane  
113    bioreactors for sludge reduction. *Bioresour. Technol.* **2019**.

114
